# Supplementary material for: Human Health Risk Assessment for Exposure to Heavy Metals via Dietary Intake of Rainbow Trout in the Influence Area of a Smelting Facility Located in Peru
Source: MDPI journal article supplement (doi:10.3390/toxics11090764), 2023-09-08
Supplement: s1 [file s1]

**Table S1.** Descriptive statistics of bioconcentration factor of heavy metals and As.

| Variable | Sector        | SD    | Min   | Median | Max   |
|----------|---------------|-------|-------|--------|-------|
| BCF-Cu   | Lower course  | 6.72  | 1.97  | 10.77  | 21.91 |
|          | Middle course | 7.16  | 2.41  | 9.97   | 24.83 |
|          | Upper course  | 5.08  | 4.12  | 7.55   | 20.06 |
| BCF-Pb   | Lower course  | 5.54  | 2.79  | 6.42   | 21.00 |
|          | Middle course | 2.37  | 3.04  | 6.67   | 10.48 |
|          | Upper course  | 4.21  | 4.44  | 9.35   | 18.77 |
| BCF-Zn   | Lower course  | 16.97 | 21.47 | 40.57  | 82.28 |
|          | Middle course | 21.95 | 22.71 | 37.90  | 95.96 |
|          | Upper course  | 19.82 | 23.57 | 40.87  | 80.91 |
| BCF-As   | Lower course  | 0.55  | 0.36  | 1.12   | 2.22  |
|          | Middle course | 0.63  | 0.87  | 1.44   | 3.25  |
|          | Upper course  | 1.25  | 0.70  | 3.29   | 4.46  |

**Table S2.** Descriptive statistics of biosediment accumulation factor of heavy metals and As.

| Variable | Sector        | SD     | Min    | Median | Max    |
|----------|---------------|--------|--------|--------|--------|
| BSAF-Cu  | Upper course  | 0.0022 | 0.0062 | 0.0097 | 0.0146 |
|          | Middle course | 0.0062 | 0.0075 | 0.0127 | 0.0291 |
|          | Lower course  | 0.0031 | 0.0042 | 0.0109 | 0.0142 |
| BSAF-Pb  | Upper course  | 0.0018 | 0.0027 | 0.0050 | 0.0086 |
|          | Middle course | 0.0019 | 0.0043 | 0.0064 | 0.0101 |
|          | Lower course  | 0.0015 | 0.0019 | 0.0045 | 0.0068 |
| BSAF-Zn  | Upper course  | 0.0024 | 0.0114 | 0.0140 | 0.0185 |
|          | Middle course | 0.0014 | 0.0133 | 0.0154 | 0.0177 |
|          | Lower course  | 0.0018 | 0.0085 | 0.0113 | 0.0138 |
| BSAF-As  | Upper course  | 0.0001 | 0.0001 | 0.0003 | 0.0004 |
|          | Middle course | 0.0002 | 0.0003 | 0.0006 | 0.0010 |
|          | Lower course  | 0.0009 | 0.0008 | 0.0026 | 0.0032 |
